# Supplementary material for: Exploration of the anticancer efficacy of a novel 1,3-thiazole analog in an ehrlich ascites carcinoma model: in vivo and in silico insights into hepatorenal protective potentials via the modulation of apoptosis, oxidative stress and inflammation
Source: Royal Society of Chemistry journal article supplement (doi:10.1039/d5ra01014d), 2025-01-01

KDa 1 2 3 4 KDa 1 2 3 4 KDa 1 2 3 4

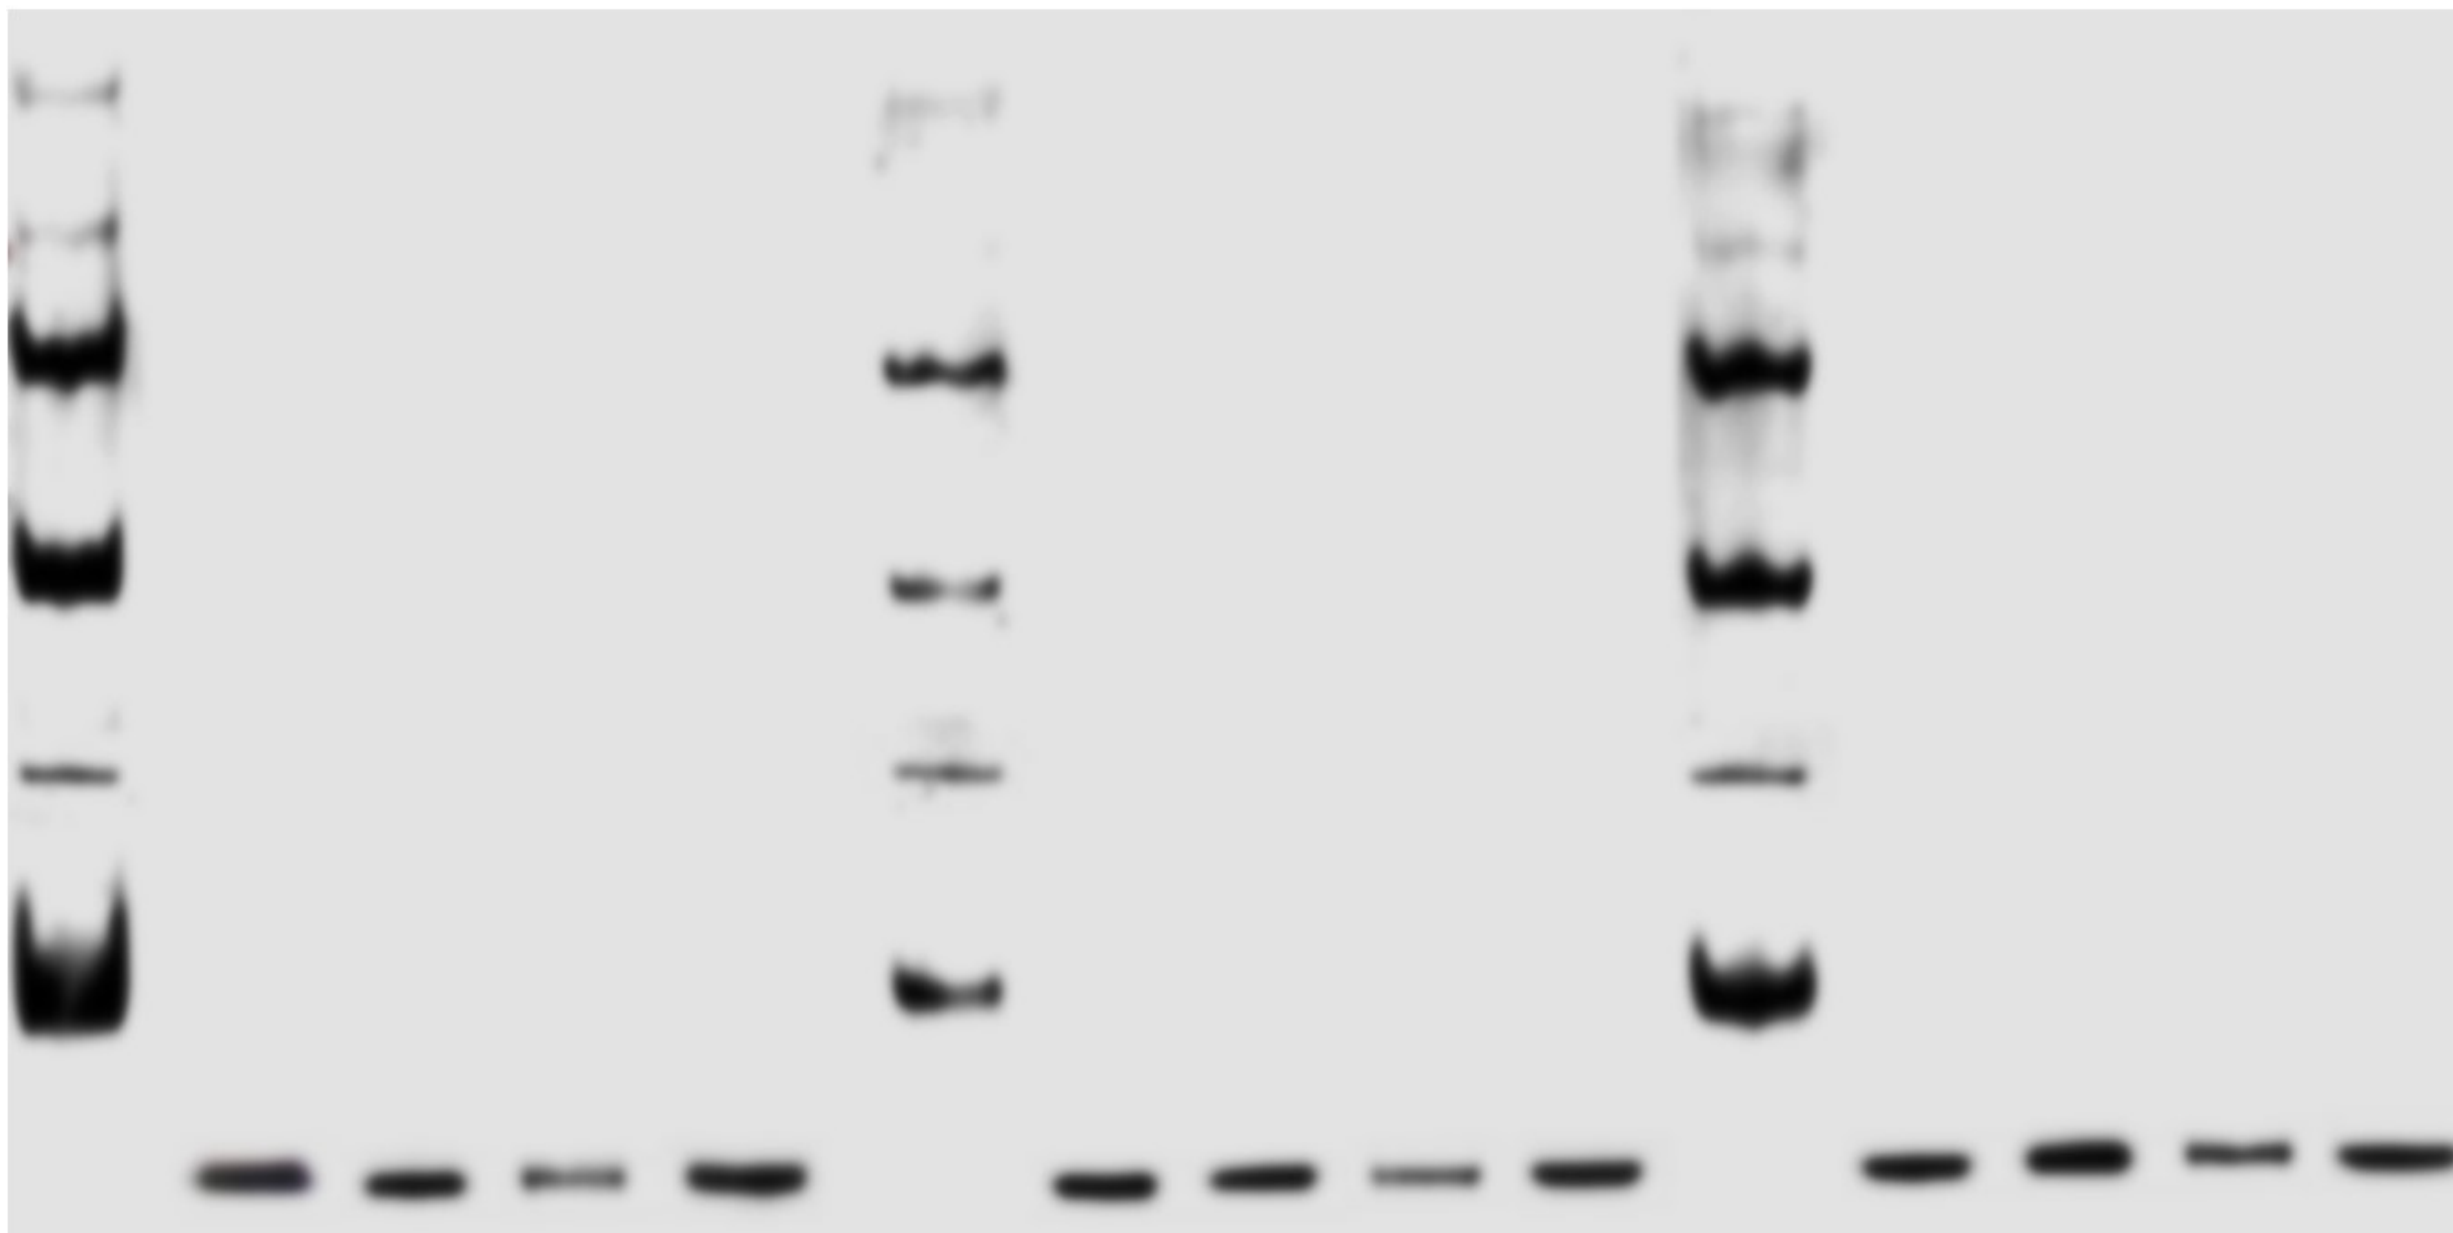

Supplement: d5ra01014d5.pdf [file d5ra01014d5.pdf]
